# Supplementary material for: Highly Sensitive Magnetic-Nanoparticle-Based Immunochromatography Assay for Rapid Detection of Amantadine in Chicken and Eggs
Source: MDPI journal article supplement (doi:10.3390/bios14010023), 2023-12-30
Supplement: s1 [file s1]

## Supplementary materials:

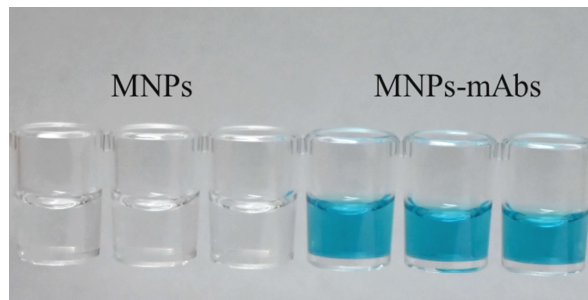

**Figure S1: MNPs-mAbs confirmed by ELISA**

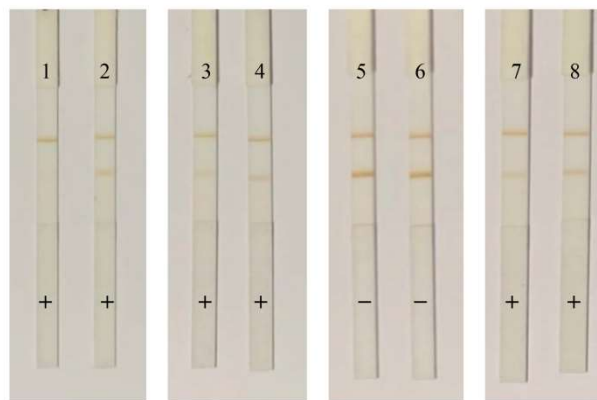

**Figure S2: Colorimetric results of real samples detected by MICA.**

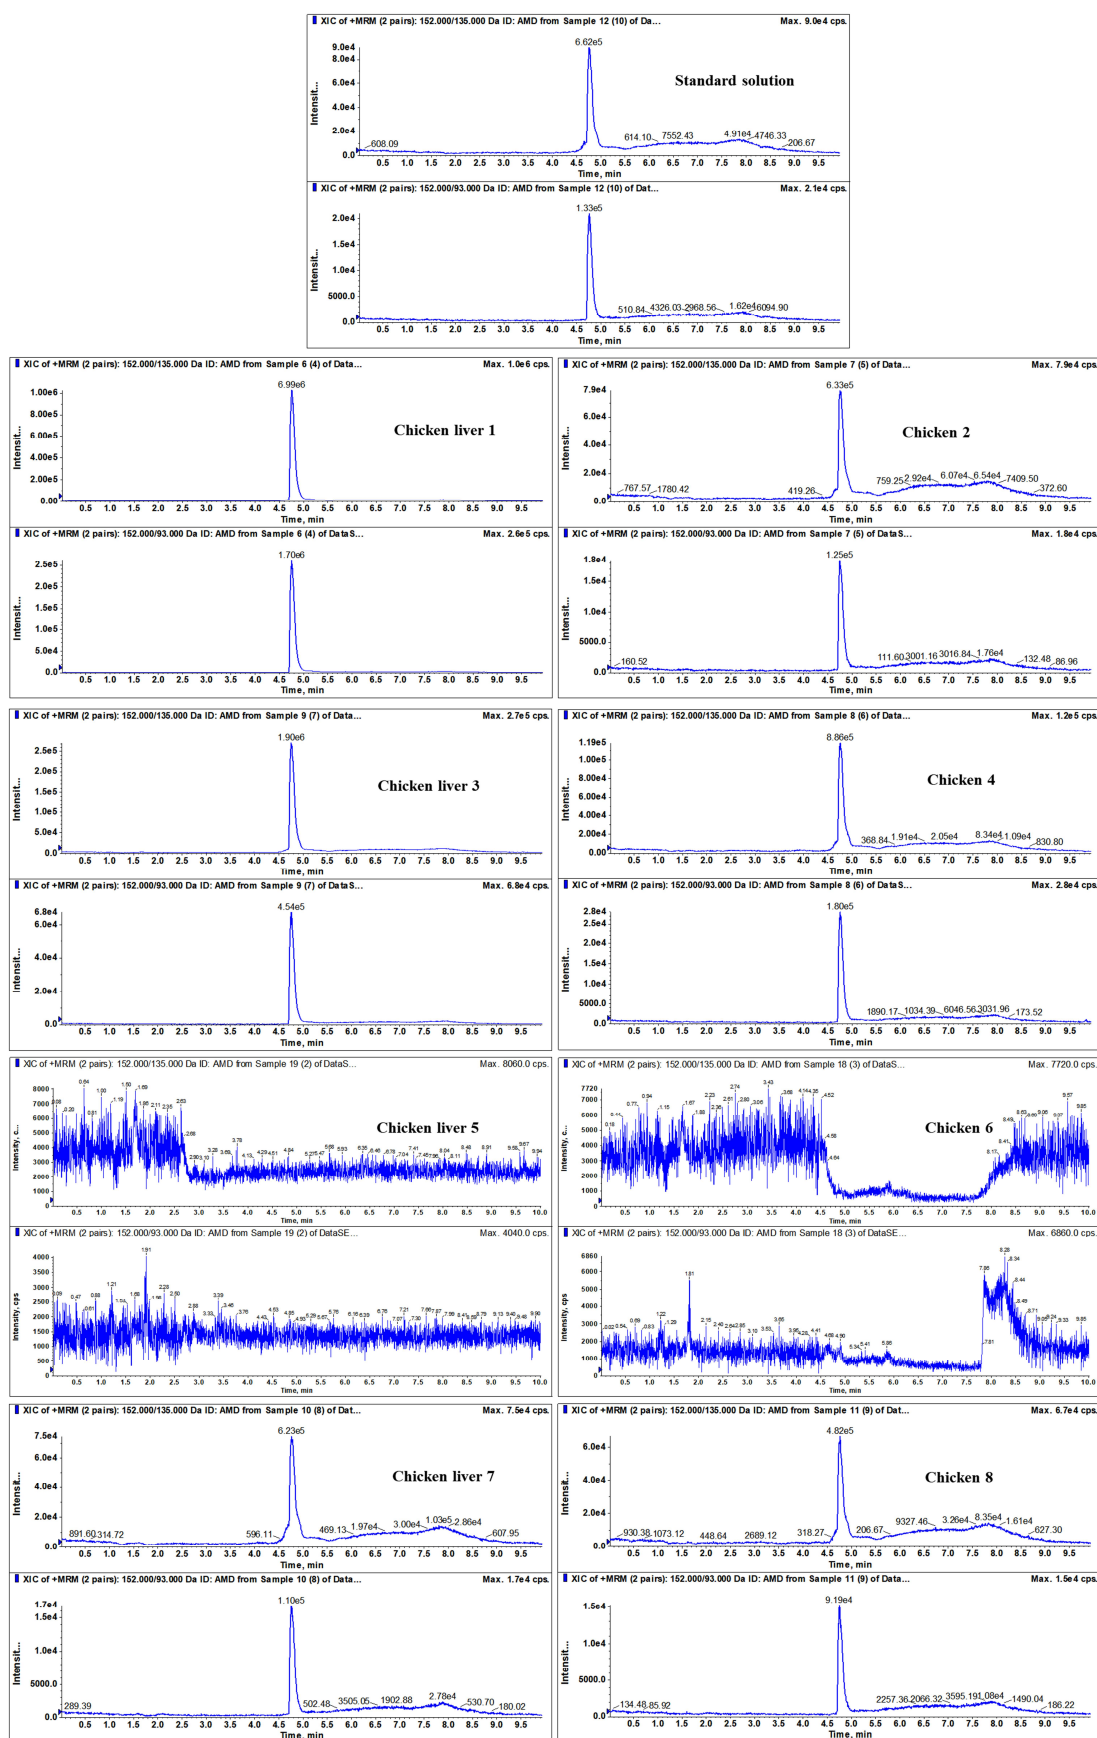

Figure S3: Mass spectrum of AMD in standard solution(5.0  $\mu$ g/L) and actual samples

**Table S1: Methods of sample preparation**

| Method | Sample  | Weight<br>( $\pm 0.05$ g) | Extractant                                            | Redissolve<br>solvents             |
|--------|---------|---------------------------|-------------------------------------------------------|------------------------------------|
| 1      | chicken | 2                         | 5 mL PBS (pH7.4)                                      | –                                  |
| 2      | chicken | 2                         | 5 mL Ethyl acetate                                    | 300 $\mu$ L PBST+<br>1 mL N-hexane |
| 3      | chicken | 2                         | 5 mL Acetonitrile+<br>0.5 g NaCl                      | 300 $\mu$ L PBST+<br>1 mL N-hexane |
| 4      | chicken | 2                         | 5 mL Acetonitrile-Ethyl<br>acetate(1:1)+0.5 g NaCl    | 300 $\mu$ L PBST+<br>1 mL N-hexane |
| 5      | egg     | 2                         | 5 mL Acetonitrile+<br>0.5 g NaCl                      | 400 $\mu$ L PBST+<br>1 mL N-hexane |
| 6      | egg     | 2                         | 5 mL Acetonitrile with 1% acetic<br>acid +0.5 g NaCl  | 400 $\mu$ L PBST+<br>1 mL N-hexane |
| 7      | egg     | 2                         | 5 mL Acetonitrile with 1% acetic<br>acid +1.0 g NaCl  | 400 $\mu$ L PBST+<br>1 mL N-hexane |
| 8      | egg     | 2                         | 5 mL 1% Hydrochloric acid-<br>acetonitrile+0.5 g NaCl | 400 $\mu$ L PBST+<br>1 mL N-hexane |
| 9      | egg     | 2                         | 5 mL 1% Hydrochloric acid-<br>acetonitrile+1.0 g NaCl | 400 $\mu$ L PBST+<br>1 mL N-hexane |

**Table S2: Difference between positive and negative values of pretreatment methods**

| Method | Sample  | Difference | Method | Sample | Difference |
|--------|---------|------------|--------|--------|------------|
| 1      | chicken | –          | 5      | egg    | ++         |
| 2      | chicken | –          | 6      | egg    | –          |
| 3      | chicken | ++++       | 7      | egg    | –          |
| 4      | chicken | ++         | 8      | egg    | +++        |
|        |         |            | 9      | egg    | ++++       |

–: no difference; +: the larger the number, the larger difference.

**Table S3: Comparison between MICA and LC-MS/MS**

| Sample        |   | MICA | LC-MS / MS |             |
|---------------|---|------|------------|-------------|
| chicken liver | 1 | +    | +          |             |
| chicken       | 2 | +    | +          |             |
| chicken liver | 3 | +    | +          |             |
| chicken       | 4 | +    | +          | +: positive |
| chicken liver | 5 | –    | –          | –: negative |
| chicken       | 6 | –    | –          |             |
| chicken liver | 7 | +    | +          |             |
| chicken       | 8 | +    | +          |             |
